# Supplementary material for: Side functionalization of diboronic acid precursors for covalent organic frameworks
Source: Royal Society of Chemistry journal article supplement (doi:10.1039/c3ce26494g), 2013-01-01

## Supplementary Information

### Side Functionalization of Diboronic Acid Precursors for Covalent Organic Frameworks

Thomas Faury, Frédéric Dumur, Sylvain Clair, Mathieu Abel, Louis Porte and Didier Gigmes

#### Table of contents

|                                                                           |   |
|---------------------------------------------------------------------------|---|
| 1. Compound <b>20</b> : 1,4-benzenediboronic acid.....                    | 2 |
| 2. Compound <b>16</b> : 2,5-dihydroxy-1,4-benzenediboronic acid .....     | 3 |
| 3. Compound <b>15</b> :2,4-dimethoxy-1,4-benzenediboronic acid.....       | 4 |
| 4. Compound <b>19</b> : 2,5-dimethyl-1,4-benzenediboronic acid.....       | 5 |
| 5. Compound <b>17</b> : 2-methyl-1,4-benzenediboronic acid.....           | 6 |
| 6. Compound <b>24</b> :2-nitro-1,4-benzenediboronic acid .....            | 7 |
| 7. Compound <b>14</b> :2,3,5,6-tetramethyl-1,4-benzenediboronic acid..... | 8 |

# 1. Compound **20** : 1,4-benzenediboronic acid

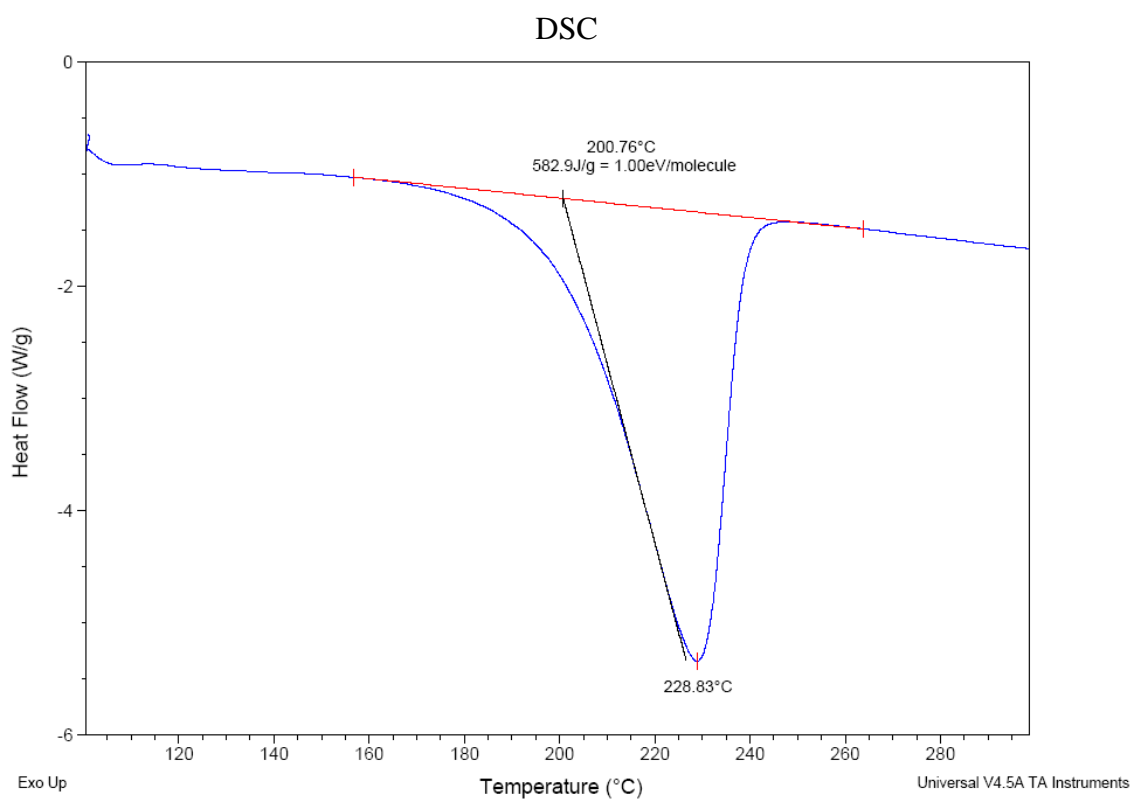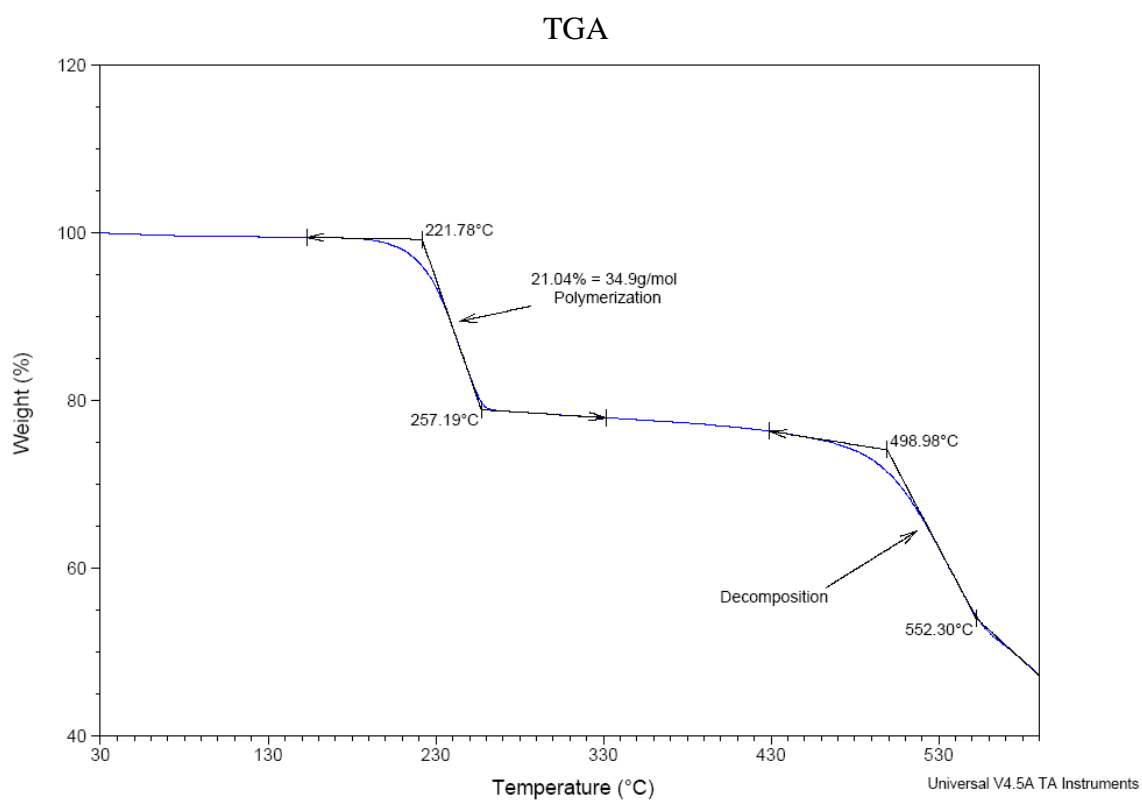

## 2. Compound **16** : 2,5-dihydroxy-1,4-benzenediboronic acid

### DSC

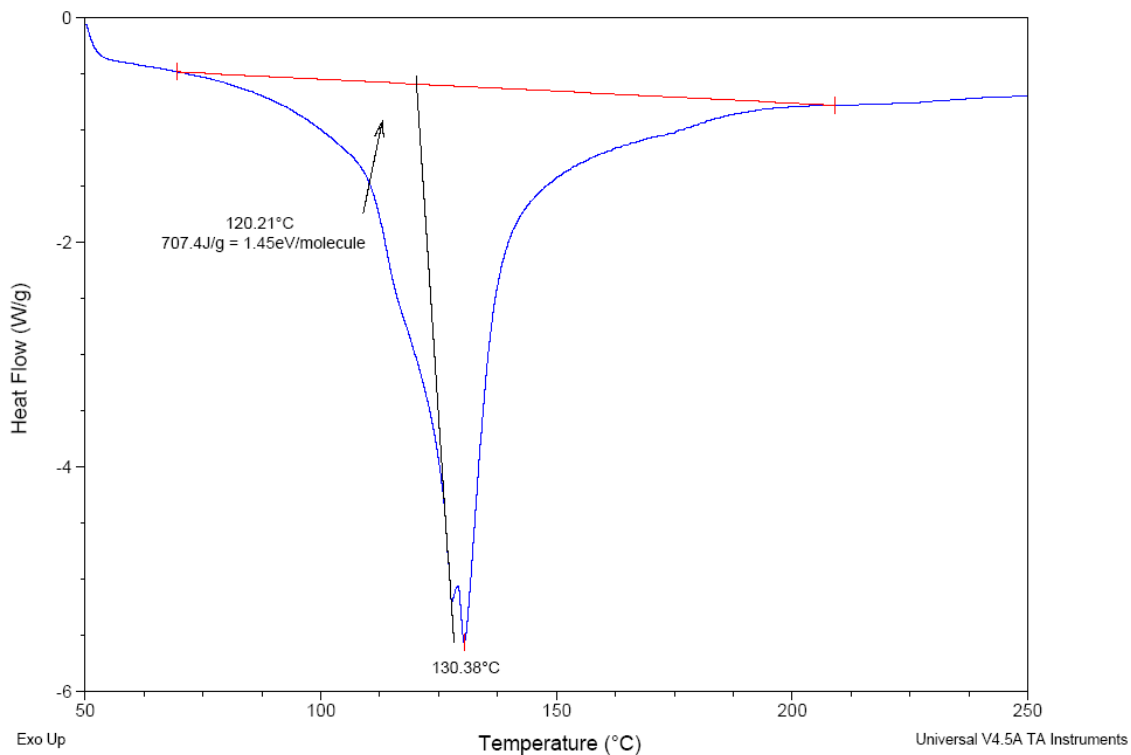

### TGA

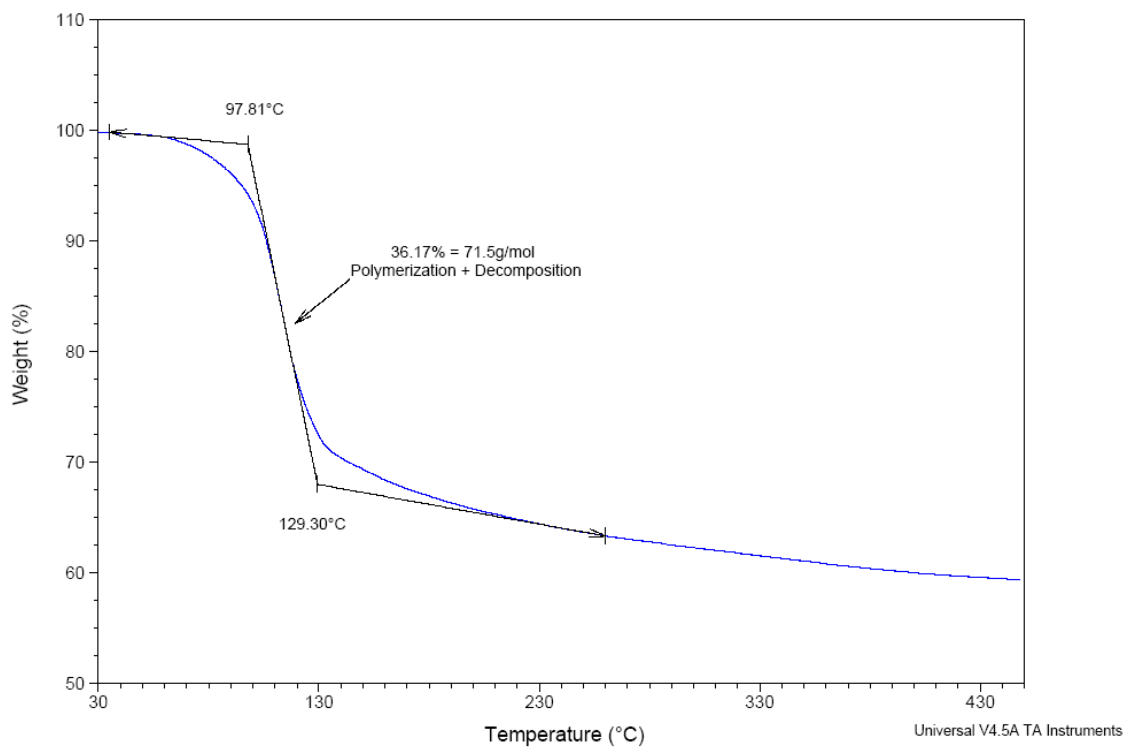

### 3. Compound **15** :2,4-dimethoxy-1,4-benzenediboronic acid

DSC

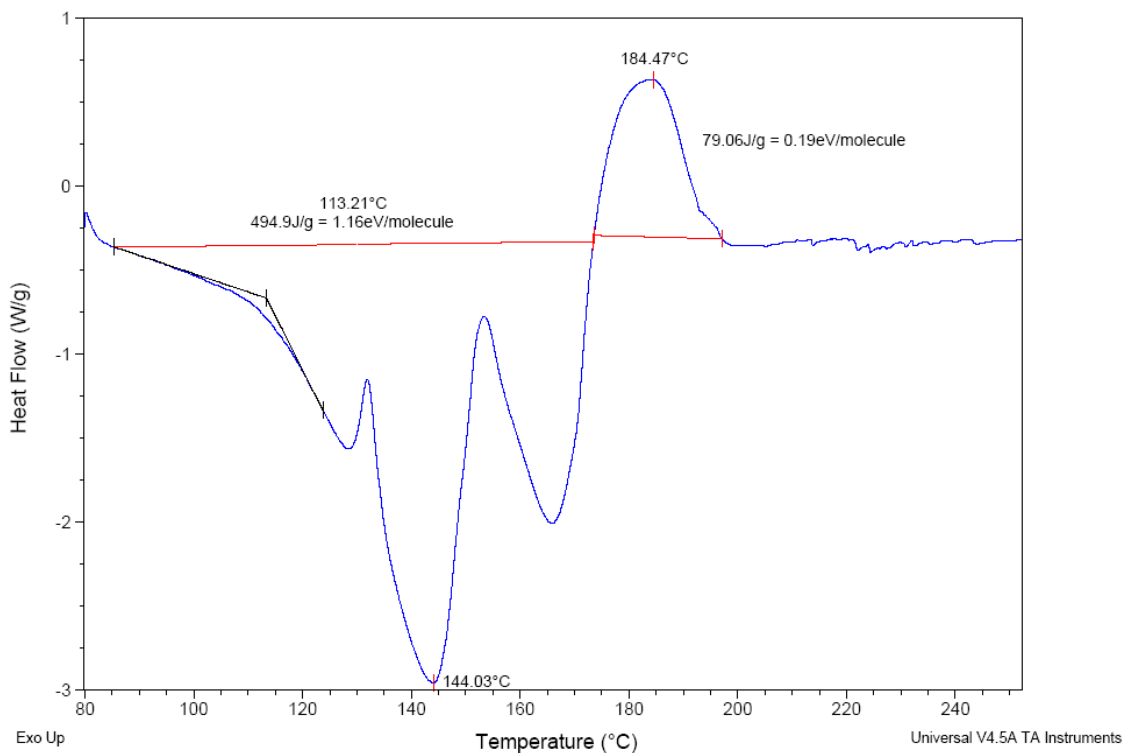

TGA

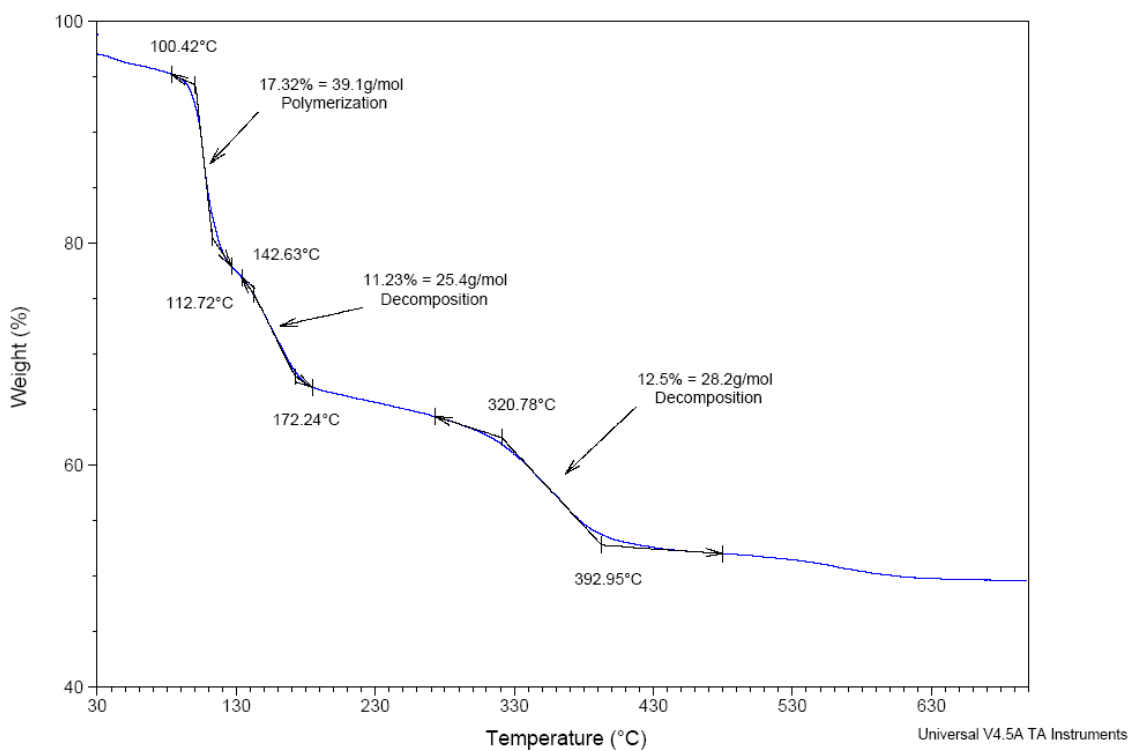

## 4. Compound **19** : 2,5-dimethyl-1,4-benzenediboronic acid

### DSC

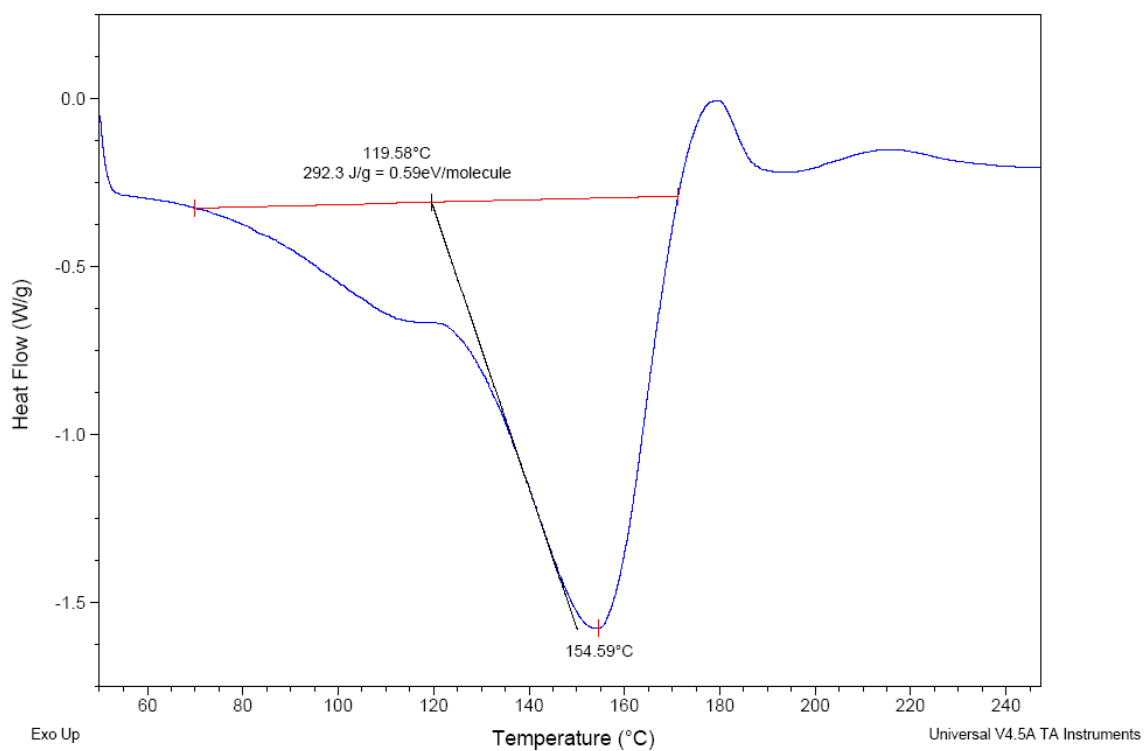

### TGA

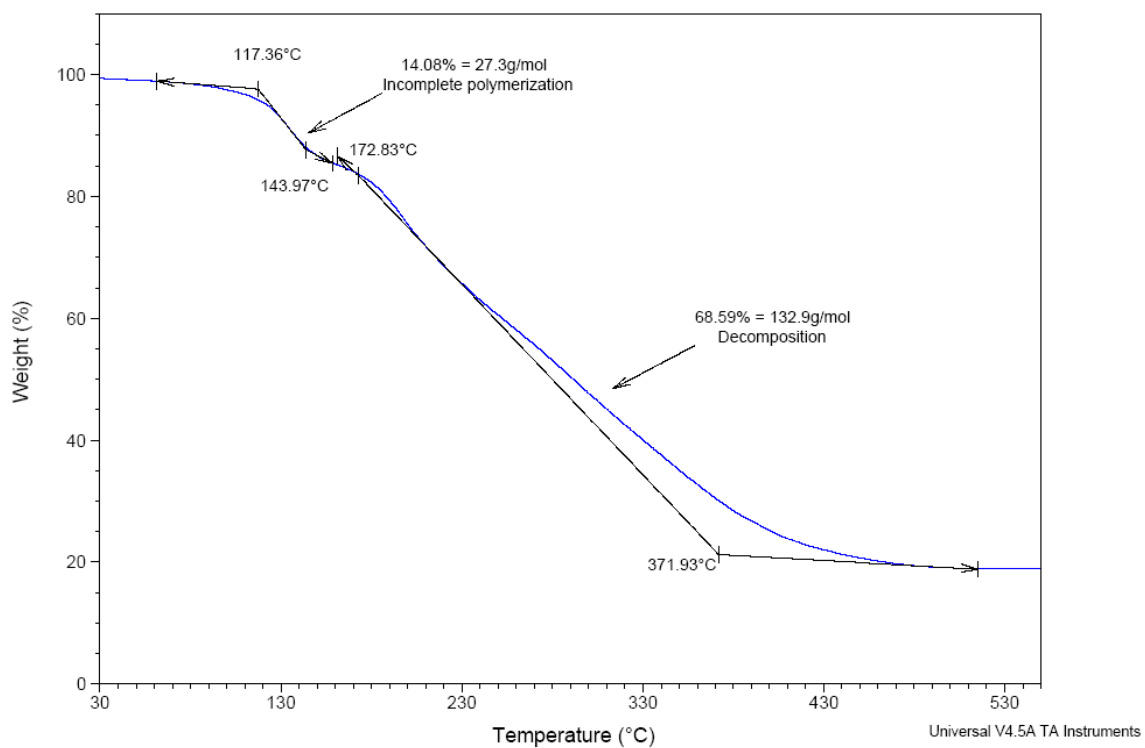

## 5. Compound **17** : 2-methyl-1,4-benzenediboronic acid

### DSC

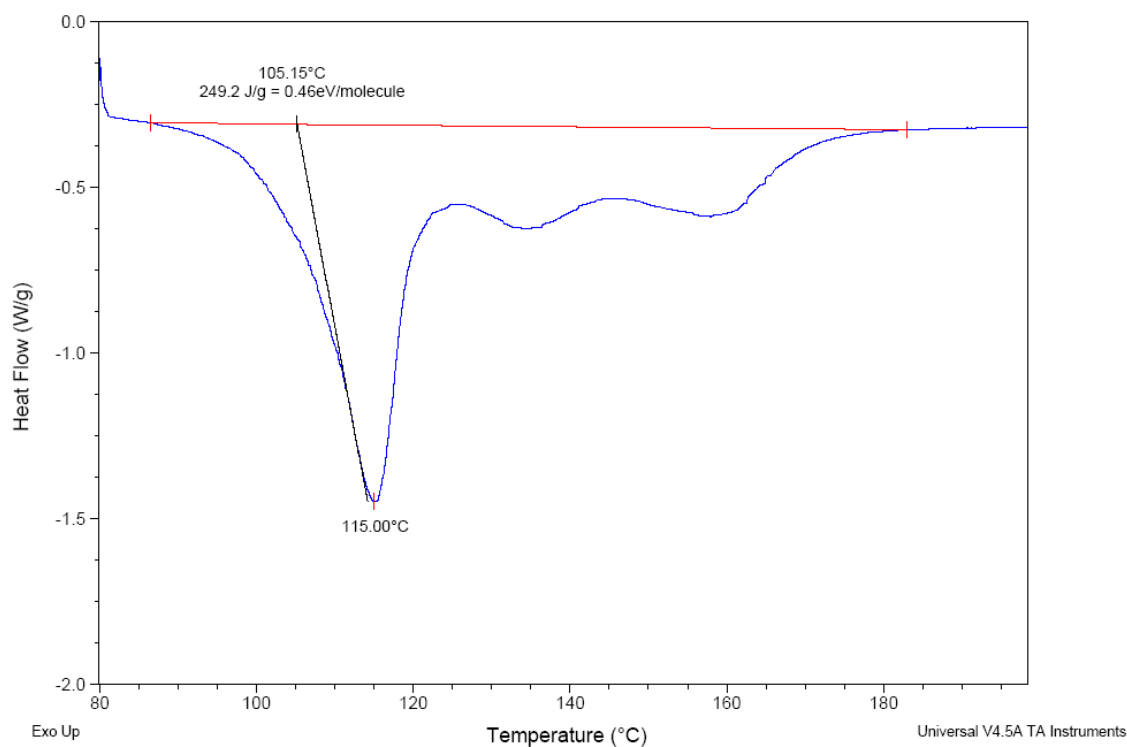

### TGA

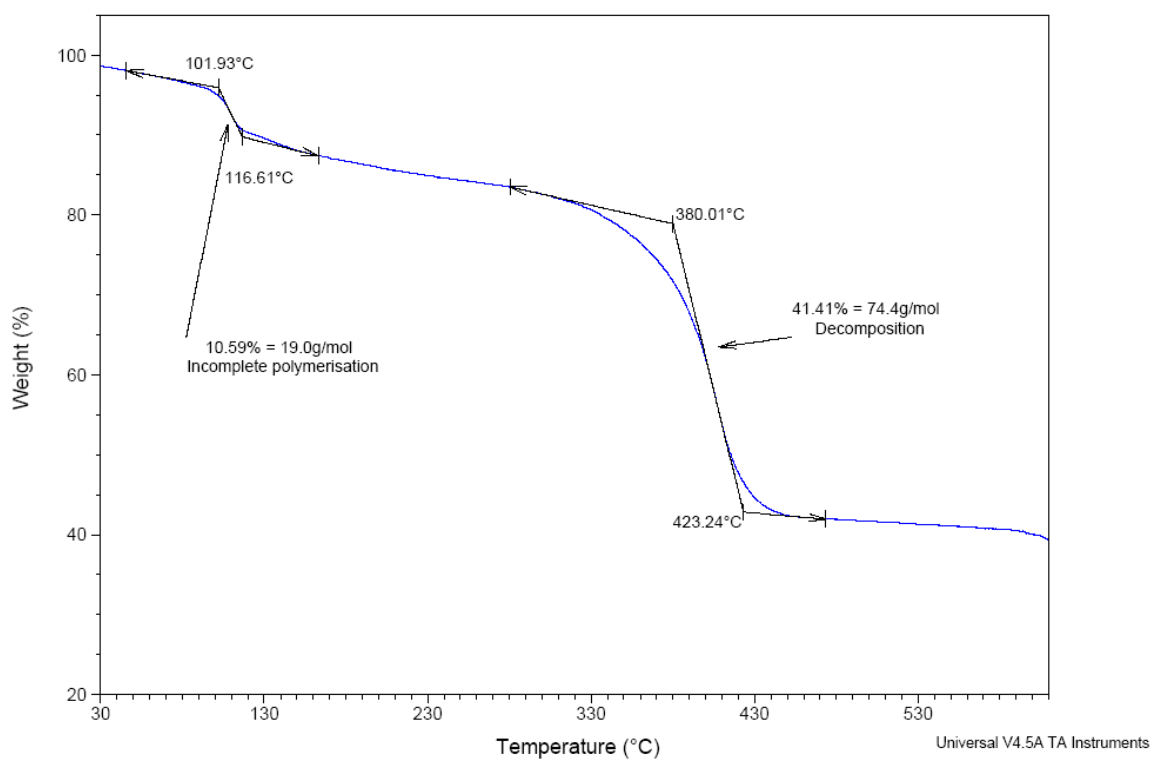

## 6. Compound **24** :2-nitro-1,4-benzenediboronic acid

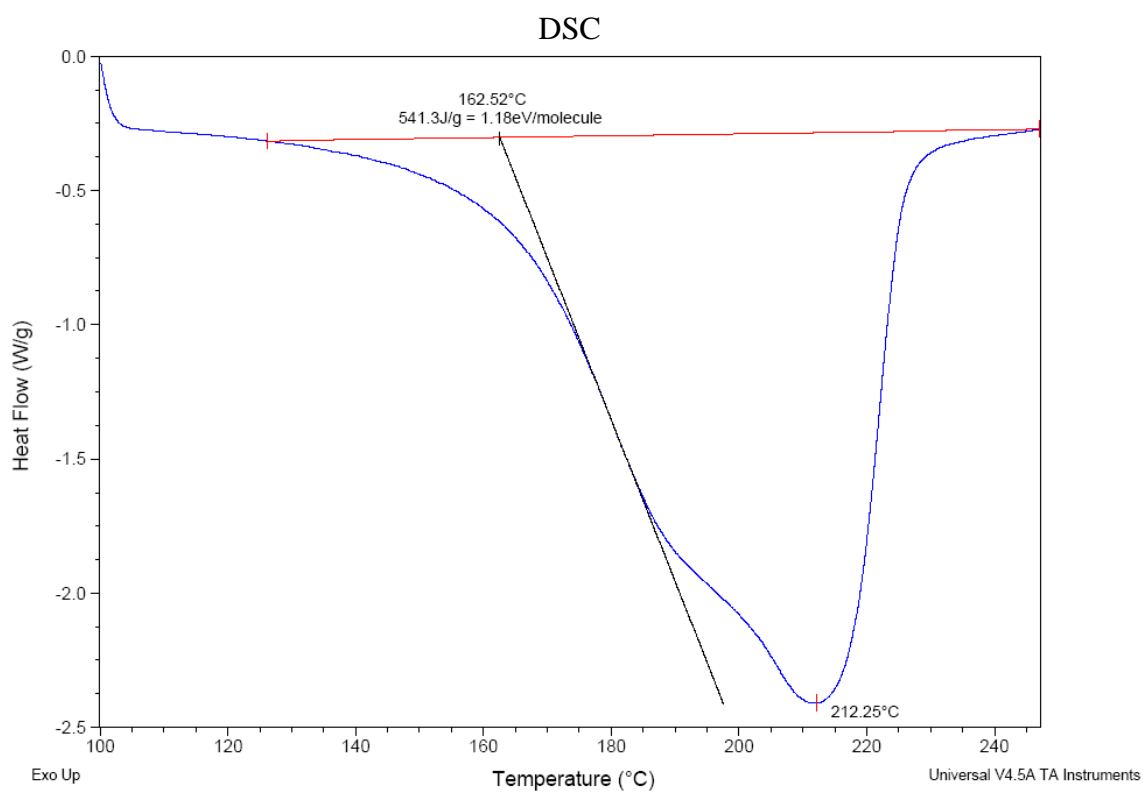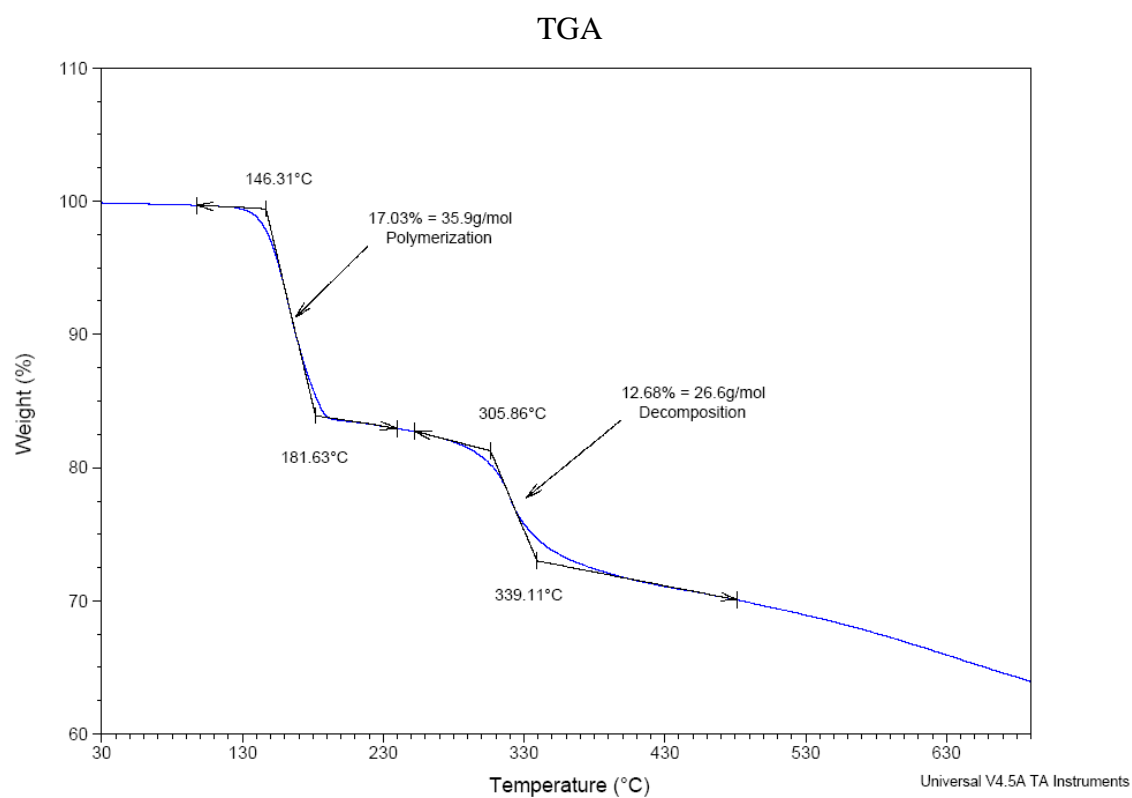

## 7. Compound **14** :2,3,5,6-tetramethyl-1,4-benzenediboronic acid

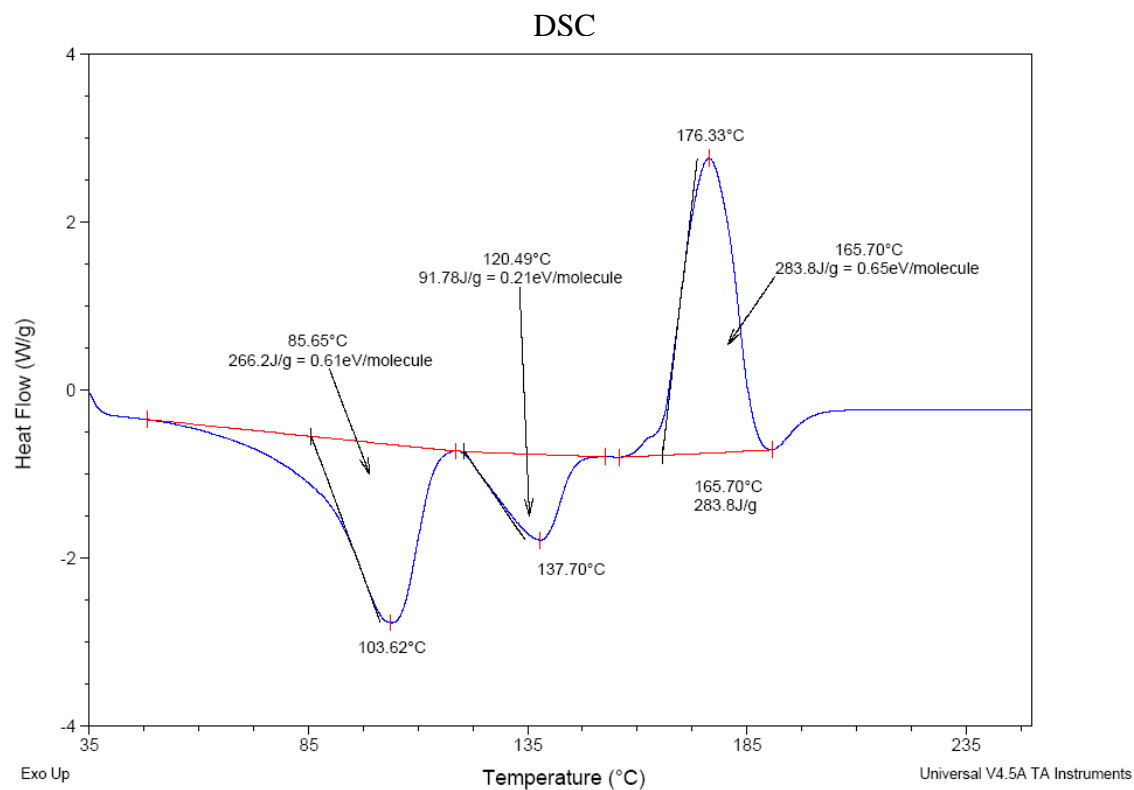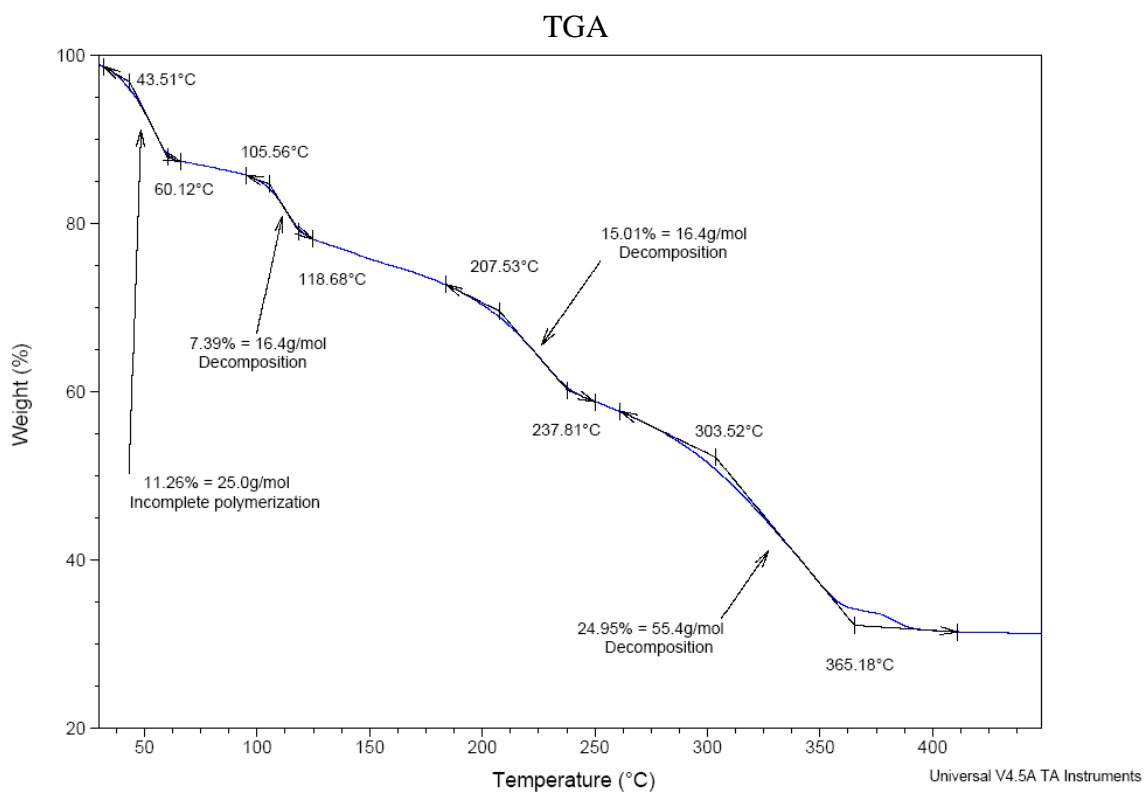

Supplement: c3ce26494g.pdf [file c3ce26494g.pdf]
